# Supplementary material for: Crude oil exposures reveal roles for intracellular calcium cycling in haddock craniofacial and cardiac development
Source: PubMed Central journal article supplement (PMC4979050; doi:10.1038/srep31058), 2016-08-10
Supplement: srep31058-s4.pdf [file srep31058-s4.pdf]

## **Supplementary Information**

Crude oil exposures reveal roles for intracellular calcium cycling in haddock craniofacial and cardiac development

Elin Sørhus, John P. Incardona, Ørjan Karlsen, Tiffany Linbo, Lisbet Sørensen, Trond Nordtug, Terje van der Meeren, Anders Thorsen, Maja Thorbjørnsen, Sissel Jentoft, Rolf B. Edvardsen and Sonnich Meier

Supplementary Figure S1: PAH profile. PAH profile at end of exposure in (A) water and (B) tissue in embryonic exposure, and (C) water and (D) tissue in larval exposure.

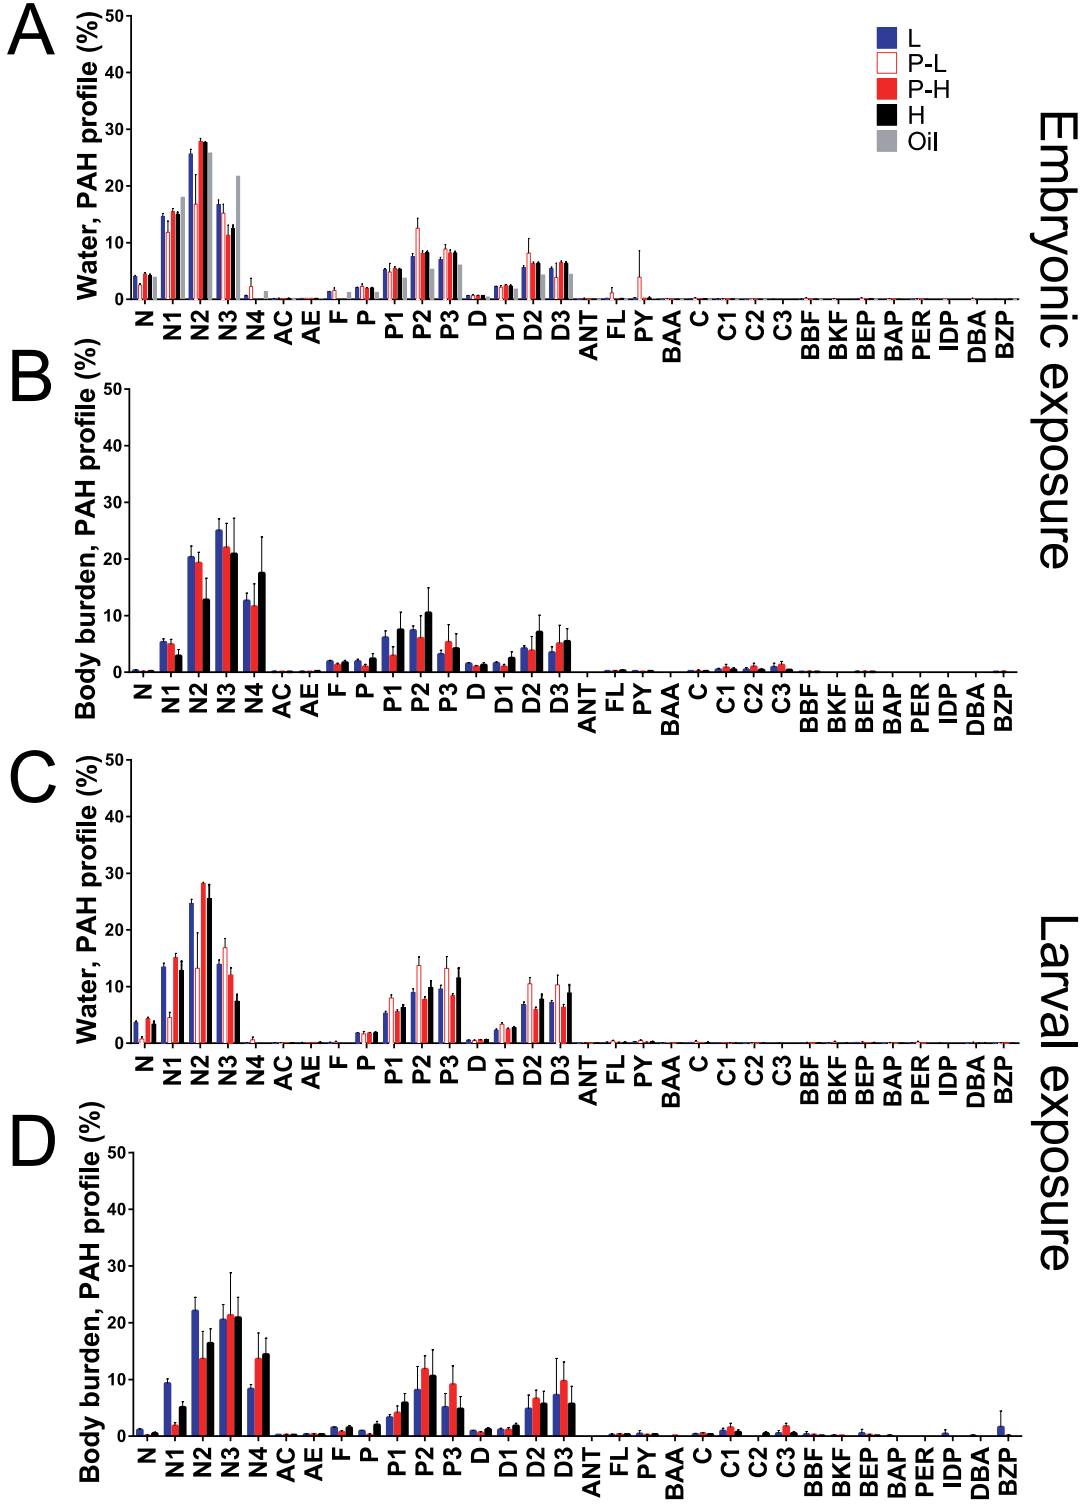

Supplementary Figure S2: Accumulation of oil droplets on eggshells. Control (left panels) vs oil-exposed embryos (right panels) after 24 (A) and 72 (B) hours of exposure. Areas with higher concentrations of dispersed oil droplets are indicated by arrows.

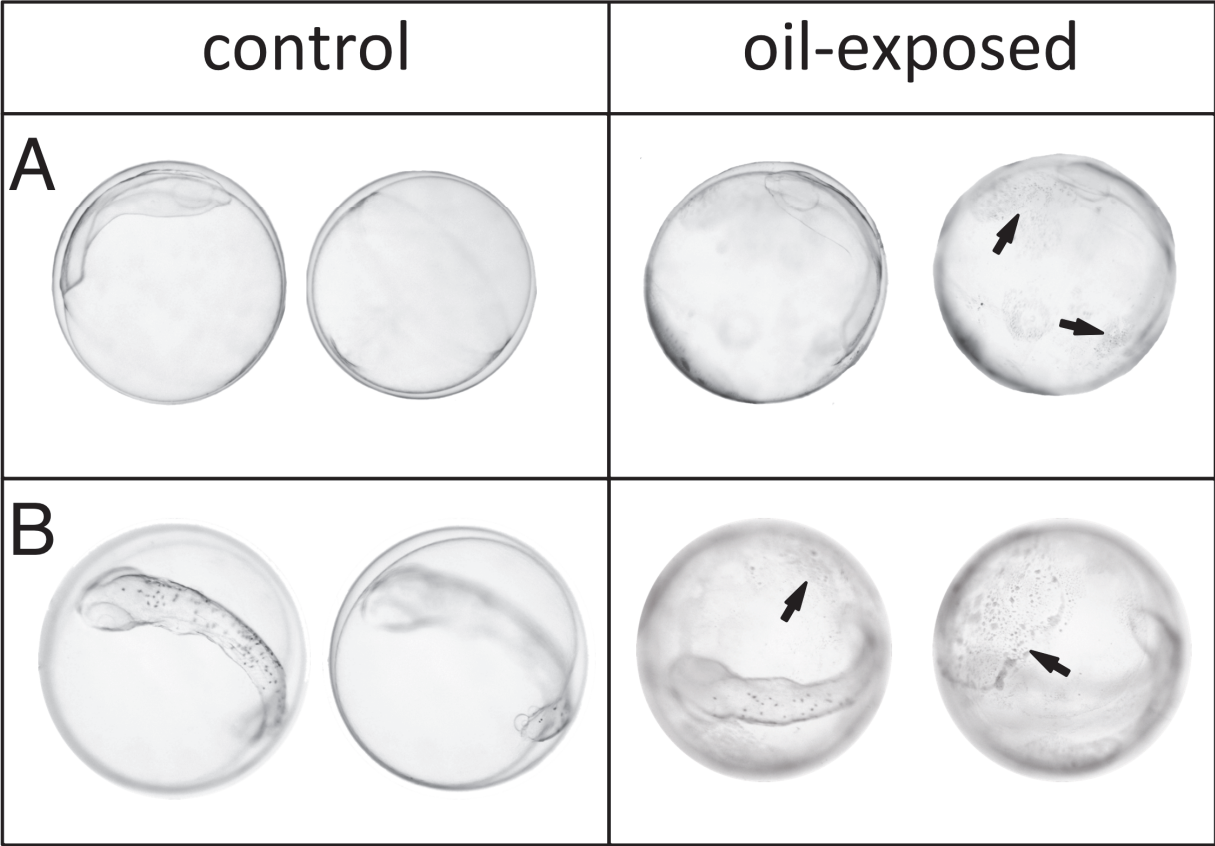

Supplementary Figure S3: Reduced toxicity and  $\Sigma$ PAH levels in outlier tanks. Log<sub>2</sub> normalized *cyp1a* mRNA levels in all low dose tanks (A) and pulse dose tanks (B) during and after exposure. (C) Dose relationship between  $\Sigma$ PAH and *cyp1a* mRNA levels X-axis shows log<sub>10</sub> normalized  $\Sigma$ PAH data with corresponding log<sub>2</sub> normalized *cyp1a* mRNA levels on the y-axis. Individual tank identities are indicated for each point; P1 and L3 tanks cluster as a separate dose.

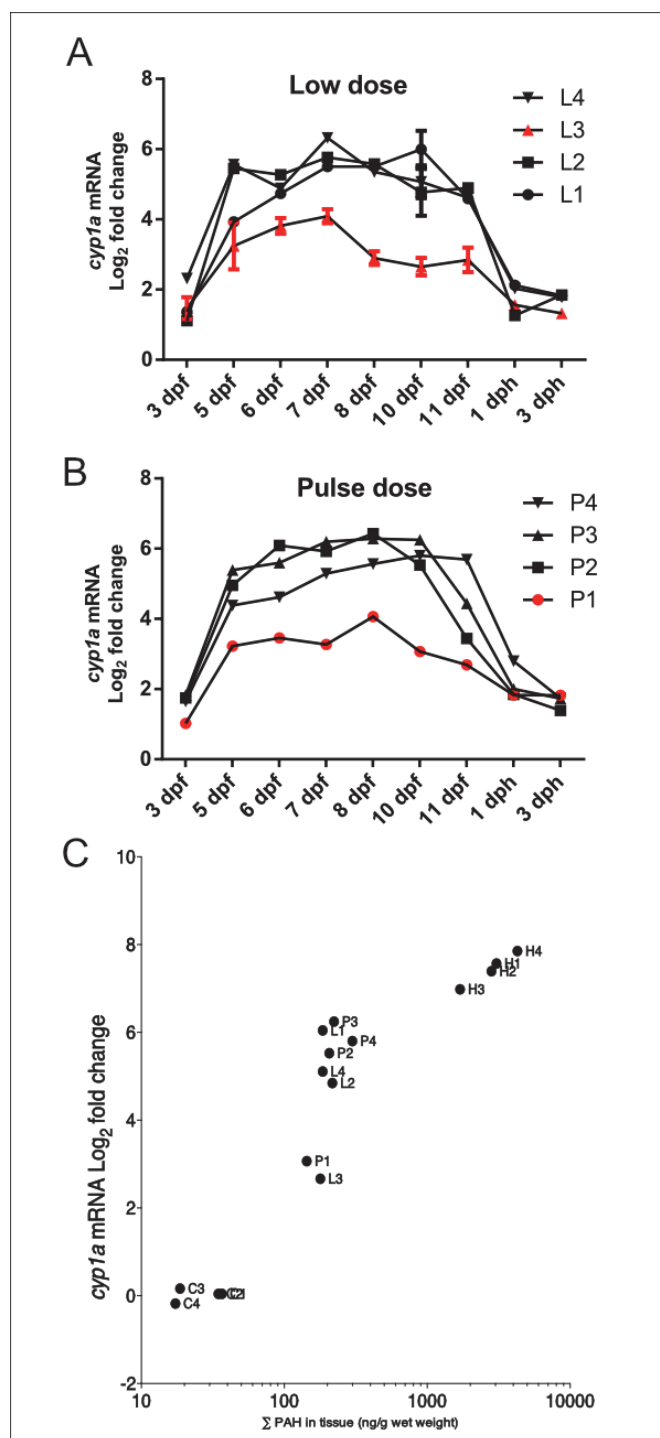

Supplementary Figure S4: Relative expression of *cyp1a* in embryonic (A) and larval (B) exposures. Expression is normalized to the expression at exposure start (2 dpf and 0 dph in embryo and larval exposure, respectively). Asterisks indicate statistical significance difference from control larvae,  $p < 0.01 = **$ .

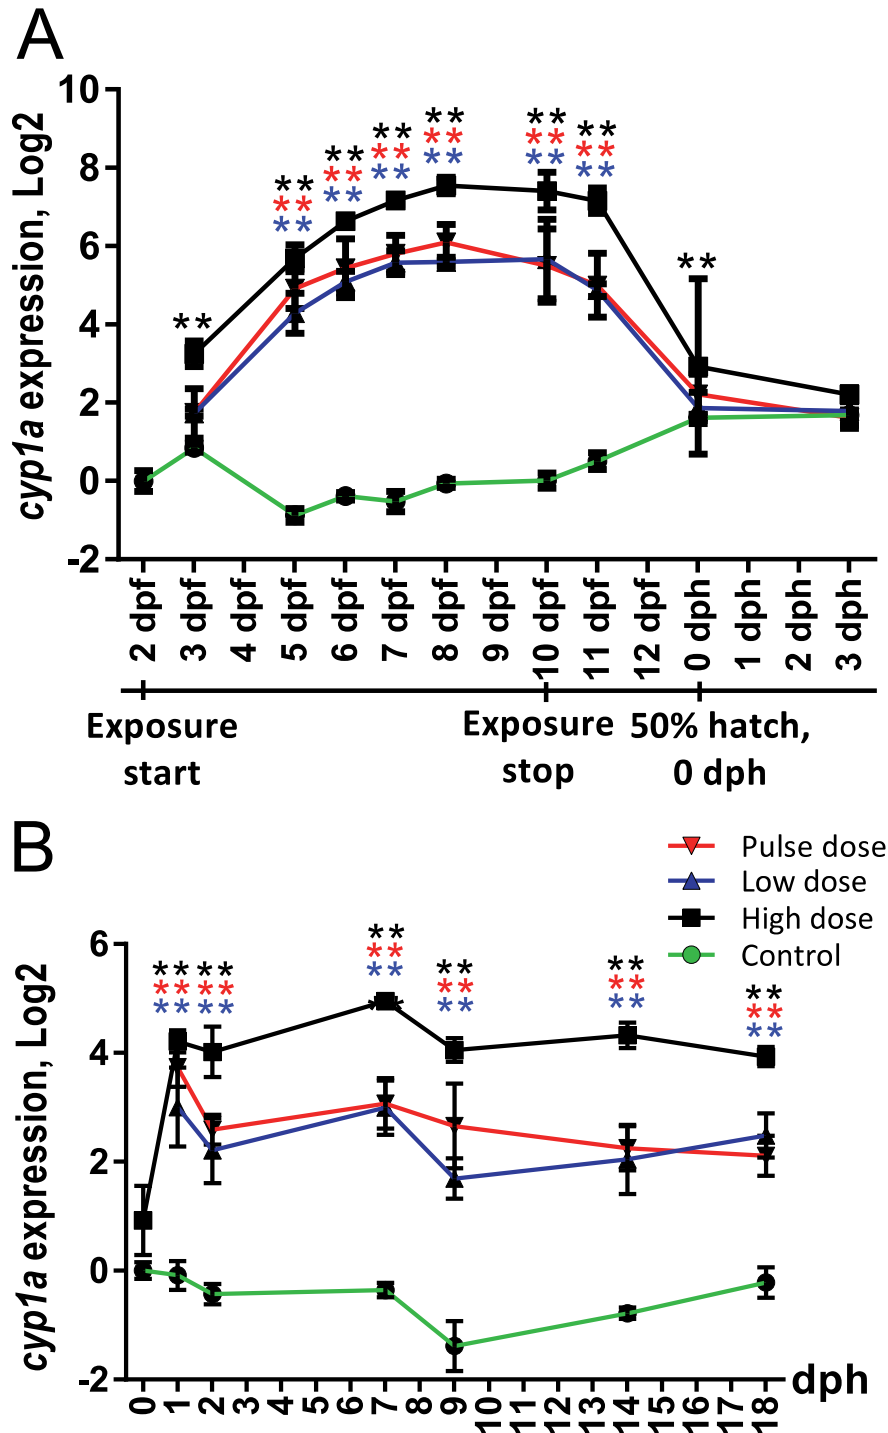

Supplementary Figure S5: Tissue distribution of Cyp1a in embryonic exposure. Whole mount immunofluorescence detection of Cyp1a protein in newly hatched larvae one day post exposure in (A) control, (B) low dose, (C) high dose. (D) Higher magnification of the heart in a high dose animal. (A-C) Filled arrows indicate the liver bud. (D) Open arrowheads and unfilled arrow in mark the myocardium and chamber lumen, respectively; arrow indicates epidermis. (A'-D') Corresponding light microscopic images. Scale bar: 200  $\mu$ m. Anterior left, dorsal top.

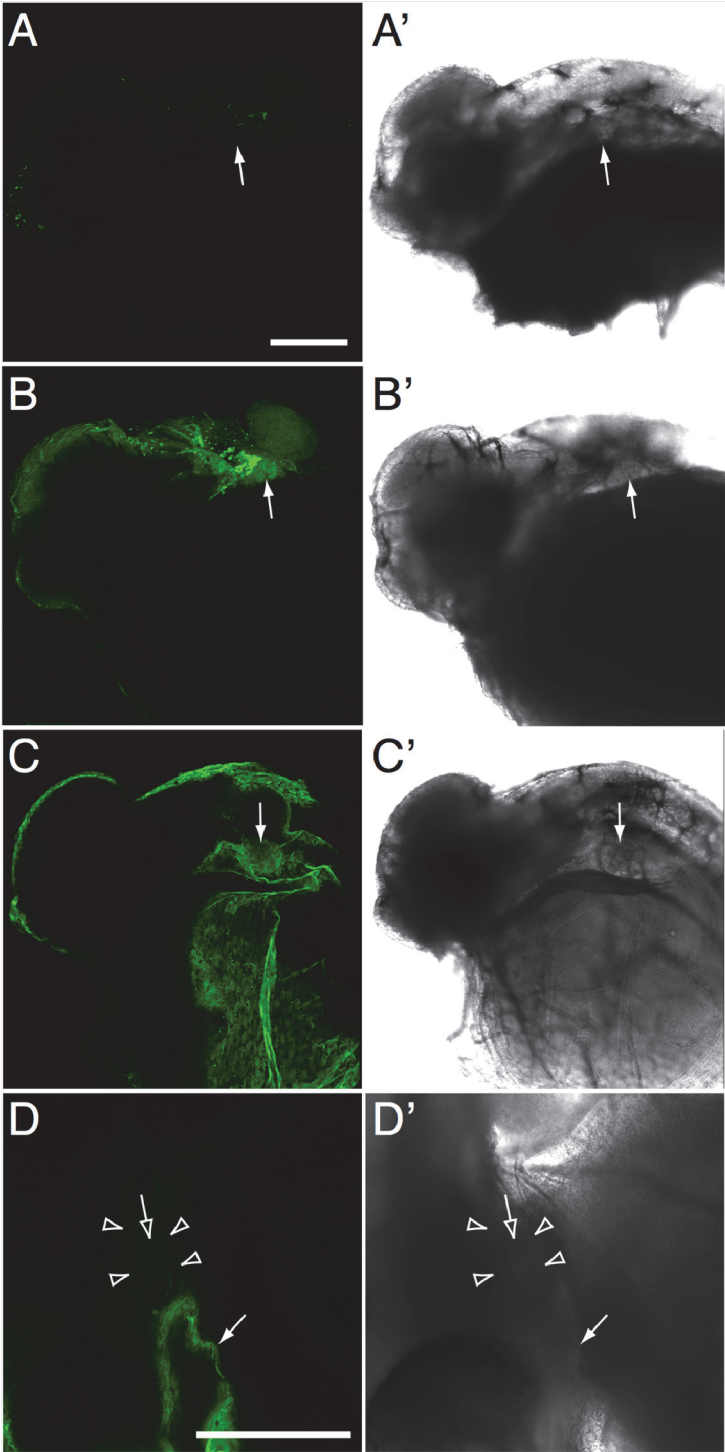

Supplementary Figure S6. *In situ* hybridisation of *cyp1a* in larval exposure. Location of *cyp1a* after one day of exposure (1 dph) in (A) control (saggital plane), low dose (saggital plane) and high dose larvae (frontal plane). (B) Location of *cyp1a* after 18 days of exposure (18 dph) in control (saggital plane), low dose (saggital plane) and high dose larvae (saggital plane). Expression of *cyp1a* was observed in cardiac endothelium (h), cardiac myocardium (m), epidermis (e), kidney, in the liver or the cells surrounding the blood vessels in the liver (l), intestine (i), gall bladder (b), brain (n) and gills (g) and sinusoid lining cells (s). Scale bars: 0.1 mm.

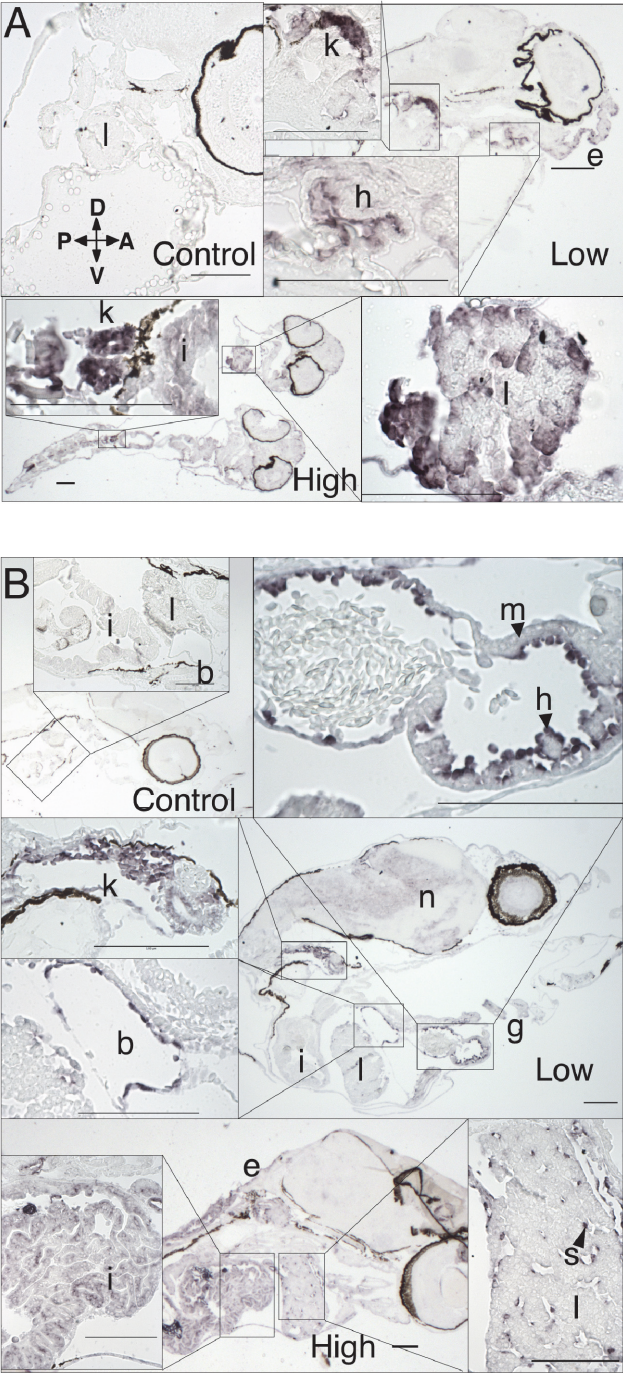

Supplementary Figure S7: Correlation between coloboma and hypotelorism. Several oil exposed individuals suffered from coloboma (filled arrow head) and the same individuals also showed a higher grade of hypotelorism (shortening of length between the eyes) (open arrow head).

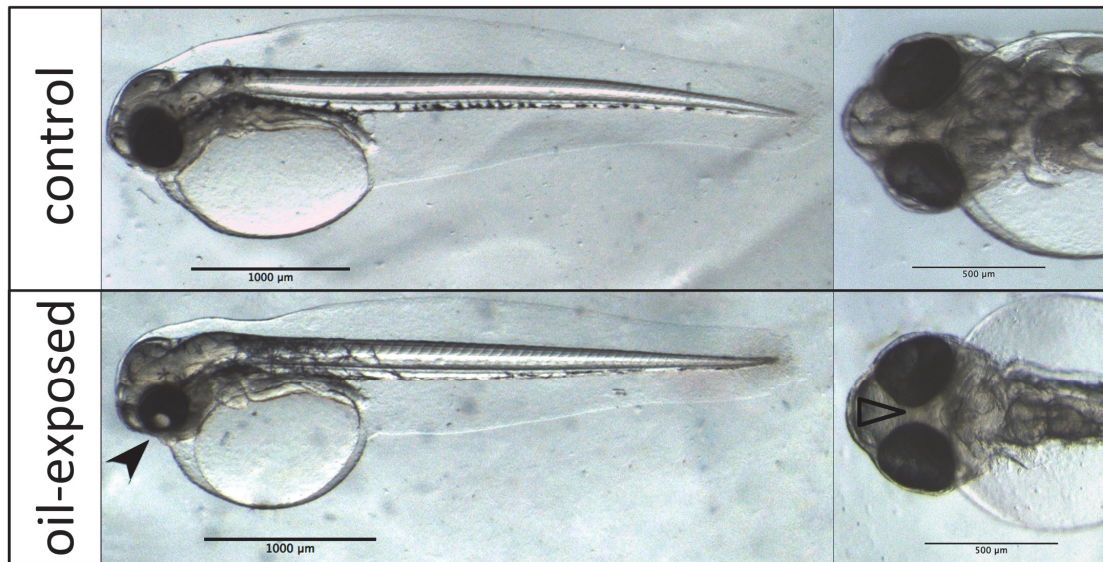

Supplementary Figure S8: Shortening of ethmoid plate. (A) Shortening of ethmoid plate (filled arrow head) and increased amount of edema (asterisk) after 9 days of exposure during early larval period in control, low dose, pulse dose and high dose. (B) Growth of the ethmoid plate in control and exposed animals from 1 dph to 21 dph. Significant difference ( $p = < 0.05$ ) between groups is indicated by letters (i.e., groups with same letters are not significantly different from each other). Scale bar = 1 mm.

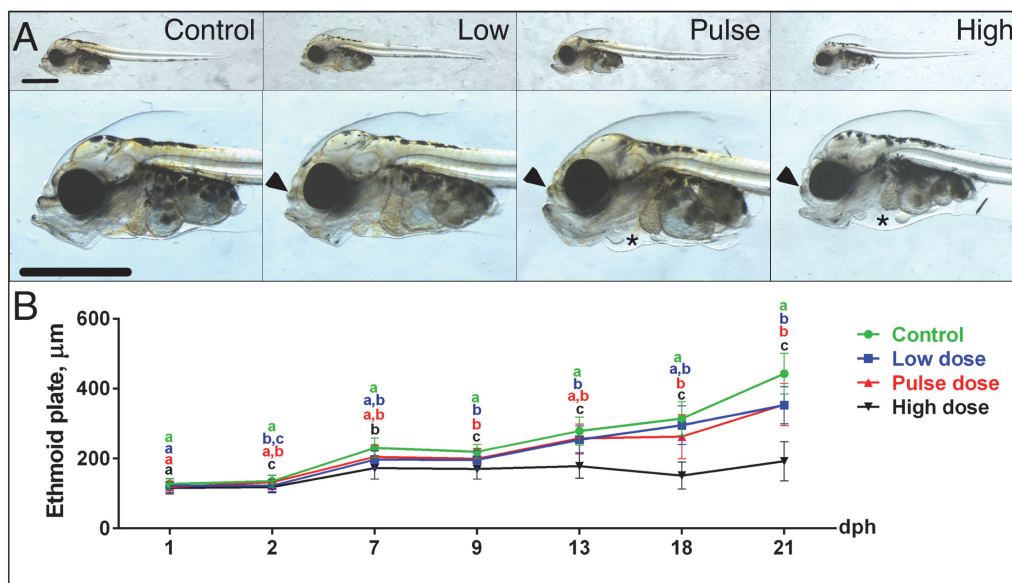



Supplementary Figure S9: Severity of edema in phenotypes. (A) The severity of edema in the four distinct phenotypes (BD = bulldog, JB = Jaw breaker, DV = Darth Vader and HB = hunchback) and in animals with no distinct phenotype. Severity of edema was graded from 0 (no edema) to 3 (severe edema) (B) Examples of phenotypes with various amount of edema.

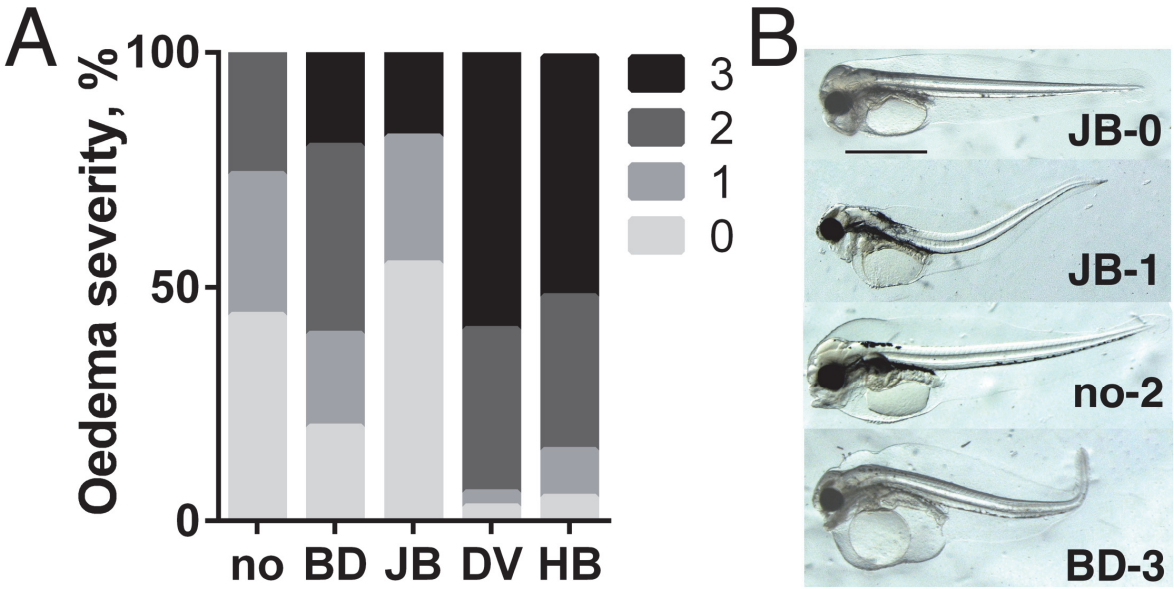

Supplementary Figure S10: Measurement of cardiac function. Measurements were performed on 2 dph larvae exposed for 24 and 48 hours in early embryo phase (pink rectangle), 0 dph and 3 dph larvae exposed throughout organogenesis and 2 and 9 dph exposed during larval phase. For means, standard deviation and significance for (A) see Table 1. (A) Fractional shortening (FS) of ventricle for embryonically exposed larvae with and without silent ventricles (SV) included, atrial FS for 0 dph and 3 dph (embryonic exposure) and ventricular FS for animals exposed in larval stages, no silent ventricles were observed here. (B) Ratio of atrial beats per minute vs ventricular beats per minute for 9 dph larvae exposed during larval stages, revealing individuals bypassing ventricular beats in red rectangle.

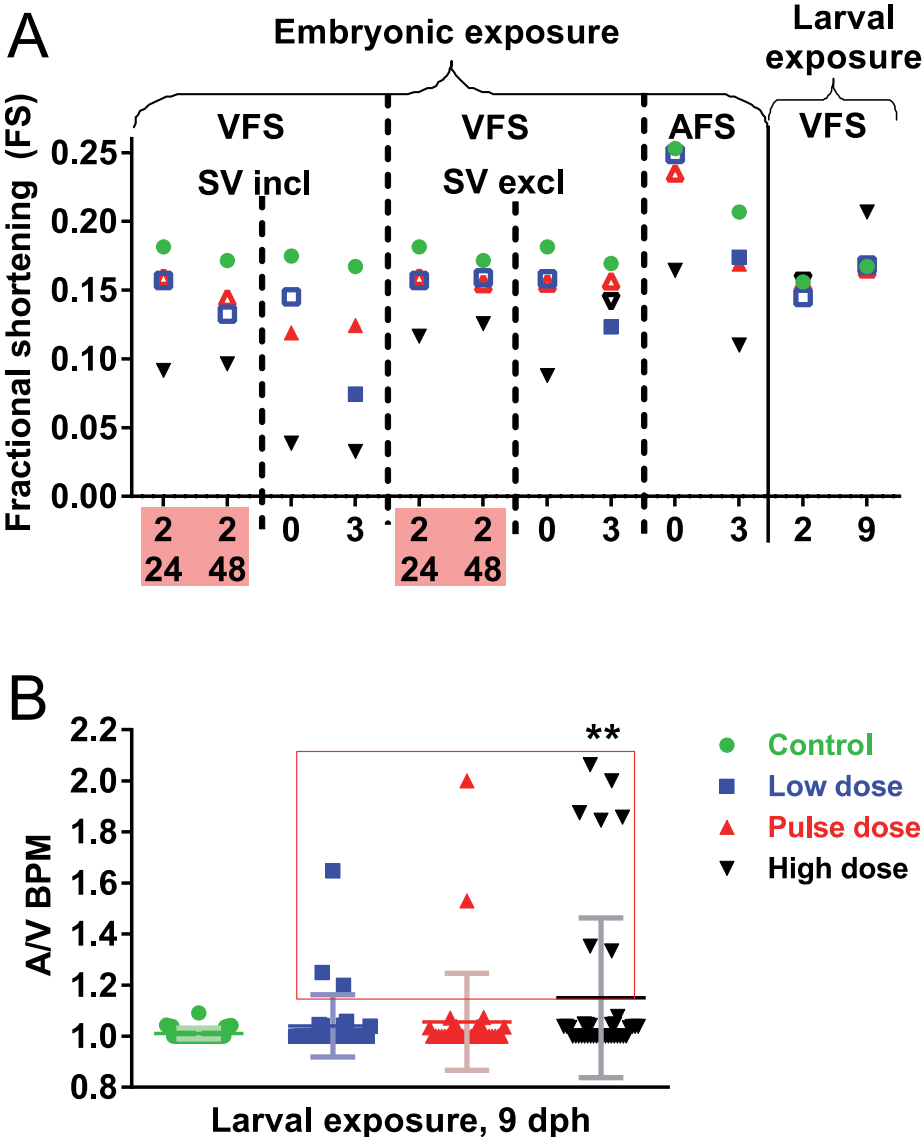

Supplementary Figure S11: Expression of (A) *wnt11*, (B) *cacna1c* and (C) *serca2* in pools during and after embryonic exposure. Significant difference ( $p \leq 0.05$ ) from control is indicated by

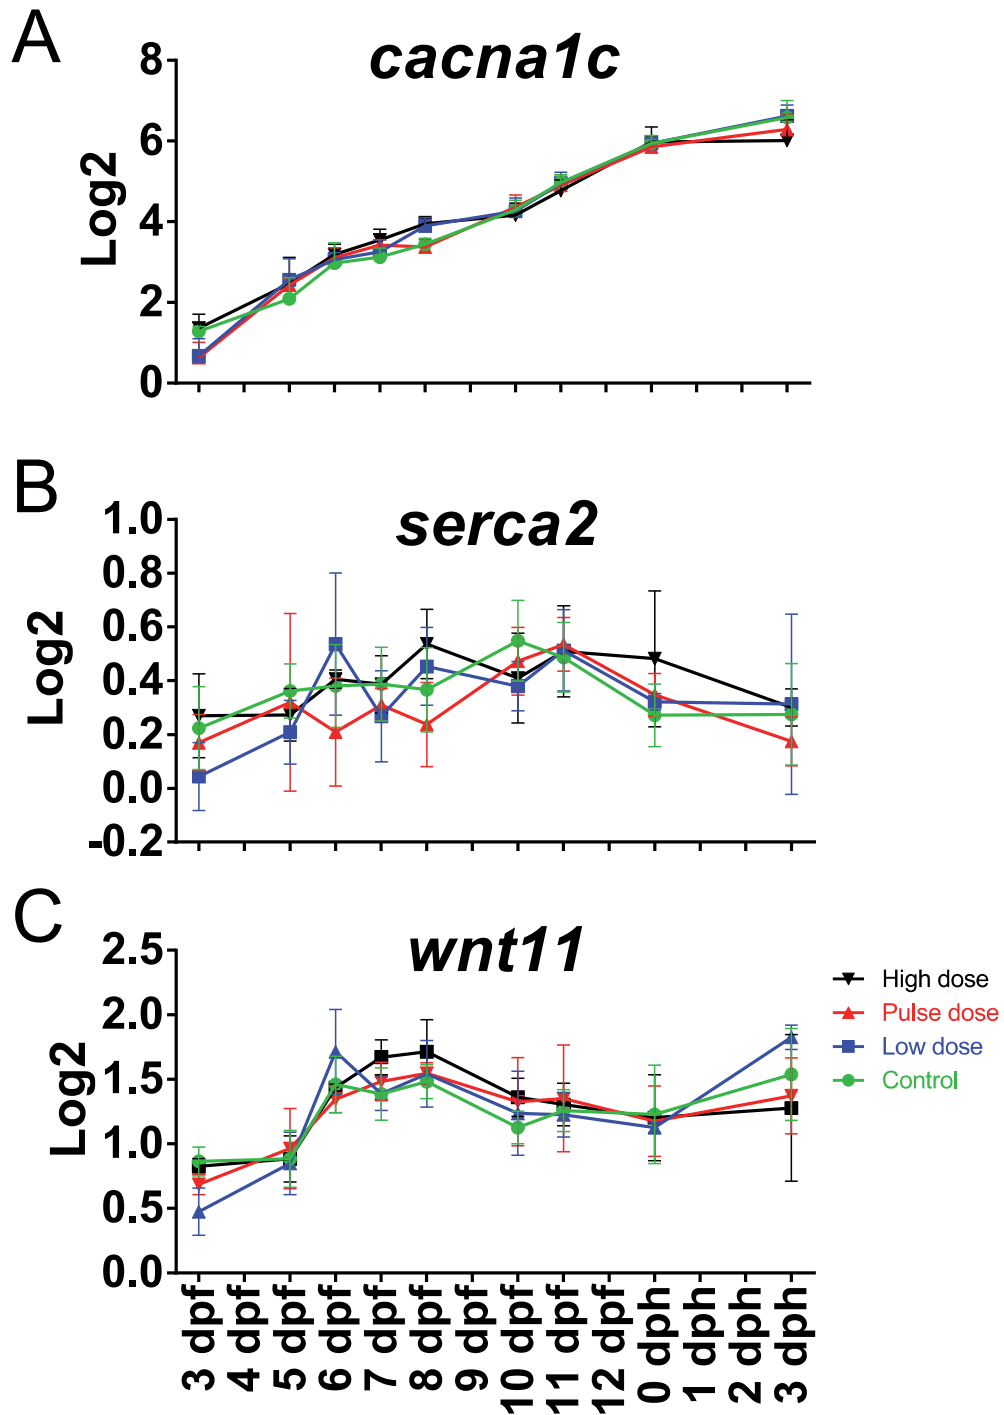

\*

Supplementary Figure S12: Expression of A) *kcnh2*, (B) *ncx1*, (C) *cacna1c*, (D) *serca2* in pools during larval exposure. Significant difference from control is indicated by \*(p < 0.05) and \*\*(p < 0.01).

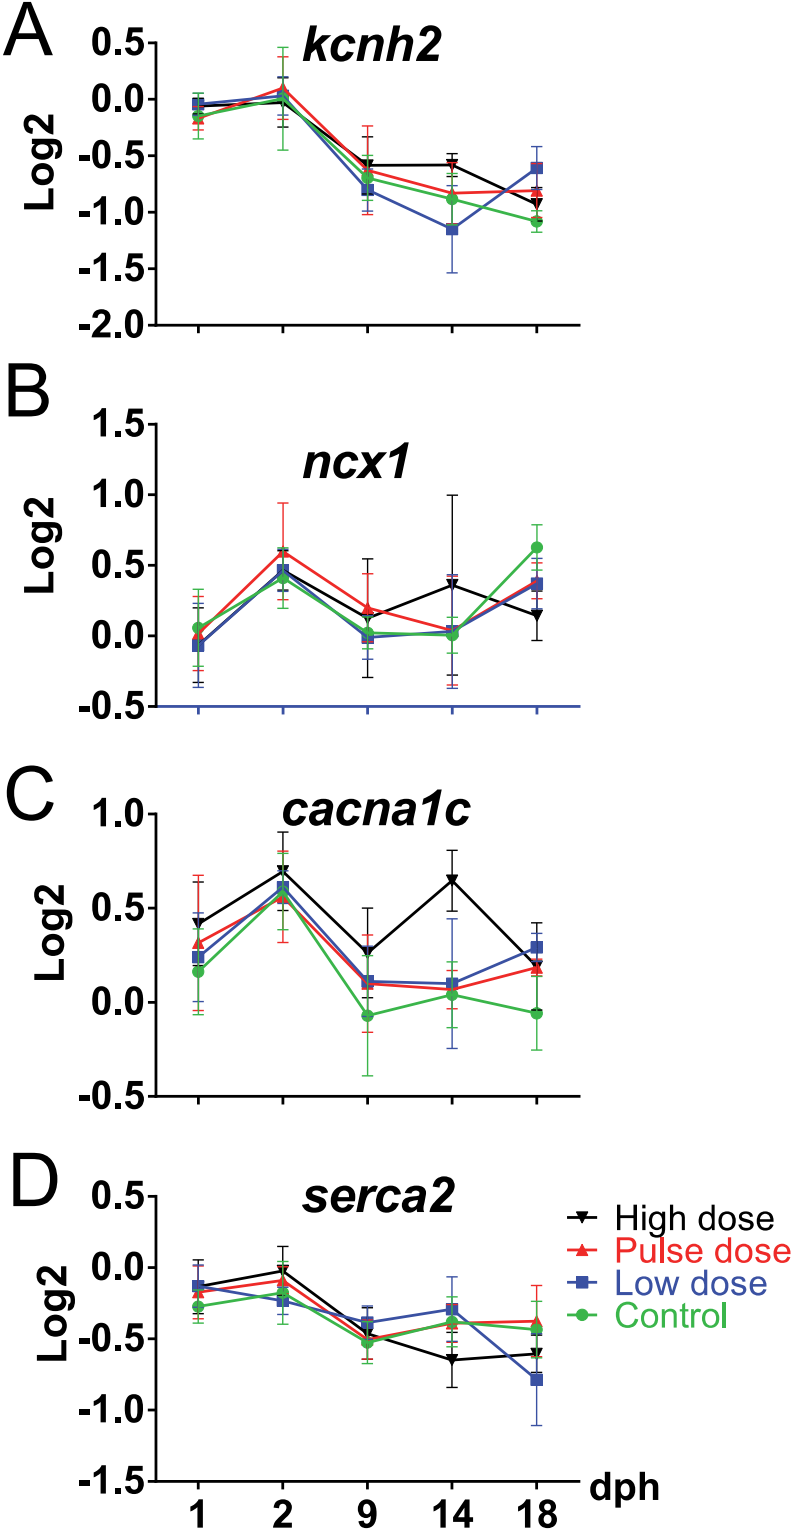

Supplementary Figure S13: Exposure of zebrafish to Heidrun oil. Control and exposed larva after 48 hours (A) and (B) and 72 hours (C) and (D), respectively. Pericardial edema, intracranial haemorrhage poor looping is indicated by black arrow, white arrow and asterisk, respectively. Percentage of edema and intracranial hemorrhage, respectively, in control (E) and exposed (F) animals.

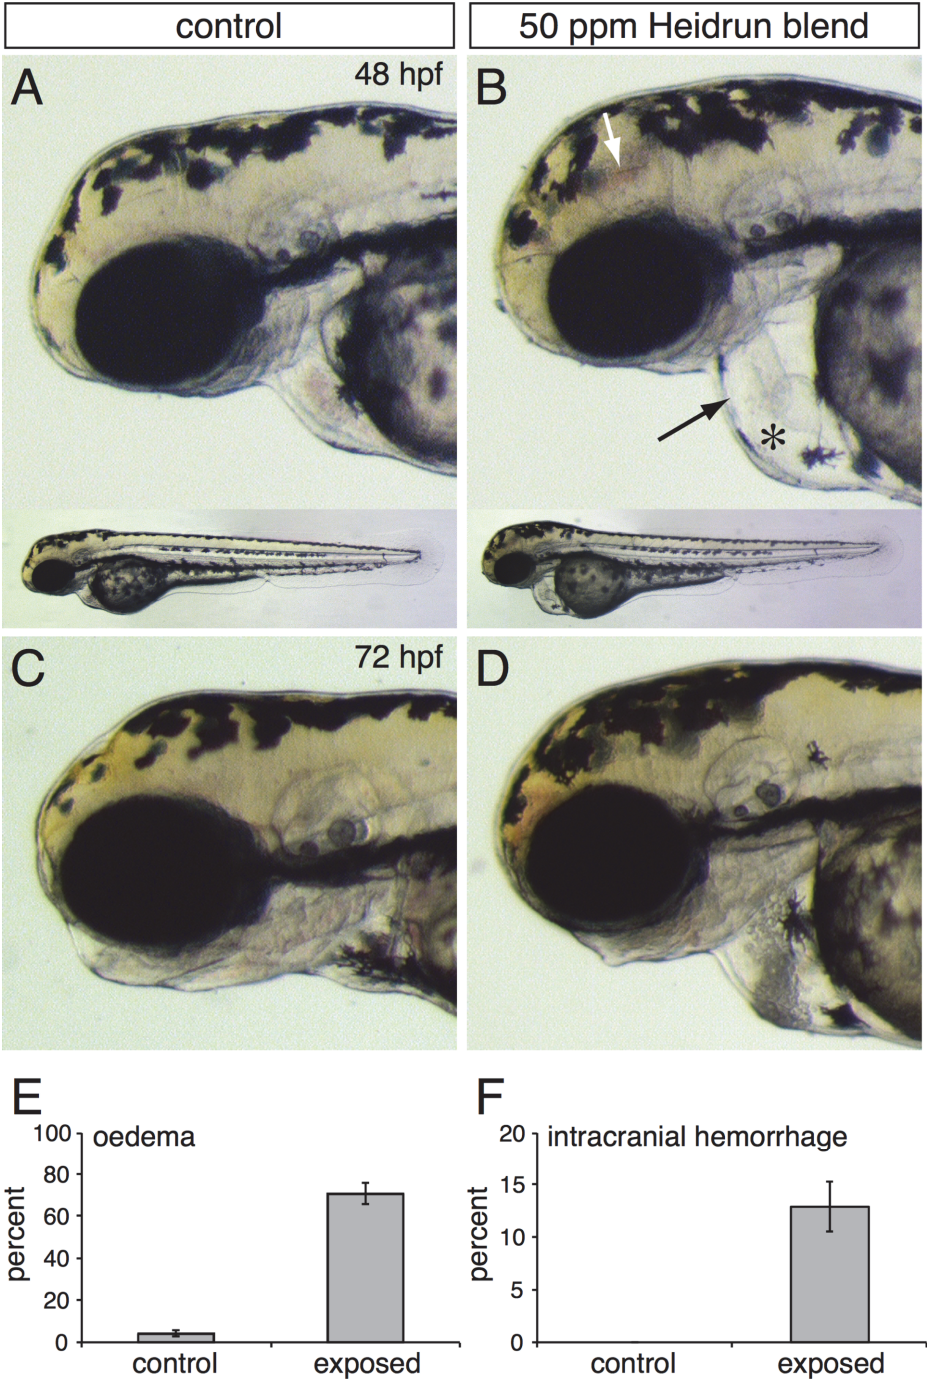

Supplementary Figure S14: Experimental design for the embryonic and larval exposures with sampling points indicated by images of embryos or larvae. (A) Exposure regime for embryonic exposure. Exposure started at 2 dpf and ended at 10 dpf. Video imaging was performed at 9 dpf, 0 dph and 3 dph. Additionally, aliquots of embryos were transferred to tanks with clean seawater after 24 and 48 hours of exposure. These were only sampled and video-imaged at 2 dph. (B) Exposure regime for larval exposure. Exposure started at 0 dph and ended at 18 dph. Larvae were video imaged at 2 dph and 9 dph.

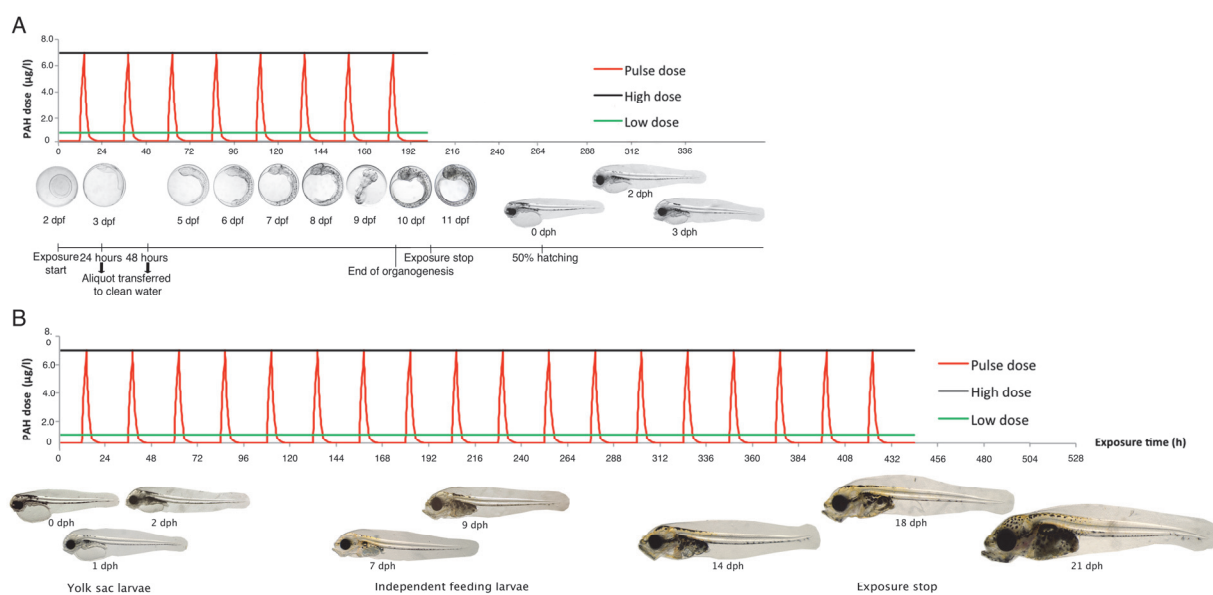

Supplementary Table S1: PAH concentration in water during embryonic exposure (ng/L) (A), in embryos (ng/g) (B), in water during larval exposure (ng/L) (C) and in larvae (ng/g) (D). The following PAH compounds were measured: C0, C1-, C2-, C3-naphthalenes (N), anthracene (ANT), acenaphthylene (AC), acenaphthene (AE), fluorene (F), phenanthrene (P), C1-, C2-, C3-phenanthrene/anthracenes (P/A), C0, C1-, C2-, C3-dibenzothiophenes (D), fluoranthene (FL), pyrene (PY), benzo[a]anthracene (BAA), chrysene (C), benzo[b]k]fluoranthene (BKF), benzo[e]pyrene (BEP), benzo[a]pyrene (BAP), perylene (PER), benzo[ghi]perylene (BZP), indeno[1,2,3-cd]pyrene (IND) and dibenzo[a,h]anthracene (DBA)

| A    |             |             |             | B            |            |             |              |             |             |
|------|-------------|-------------|-------------|--------------|------------|-------------|--------------|-------------|-------------|
|      | Control     | Low doses   | Pulse (low) | Pulse (High) | High       | Control     | Low          | Pulse       | High        |
| N    | 1 ± 0       | 23 ± 1      | 2 ± 0       | 303 ± 44     | 282 ± 4    | 0.08 ± 0.06 | 0.61 ± 0.24  | 0.09 ± 0.15 | 5 ± 2       |
| N1   | 3 ± 1       | 85 ± 5      | 11 ± 5      | 1054 ± 139   | 1005 ± 10  | 0.01 ± 0.01 | 11 ± 1       | 12 ± 3      | 86 ± 37     |
| N2   | 3 ± 1       | 149 ± 13    | 16 ± 9      | 1907 ± 296   | 1859 ± 67  | 4.0 ± 0.4   | 40 ± 4       | 49 ± 1      | 378 ± 152   |
| N3   | 8 ± 1       | 97 ± 6      | 14 ± 5      | 762 ± 97     | 838 ± 21   | 7 ± 2       | 49 ± 5       | 58 ± 6      | 620 ± 256   |
| N4   | 0.7 ± 0.3   | 3.5 ± 0.3   | 1.8 ± 0.8   | 0.2 ± 0.1    | 0.2 ± 0.0  | 4 ± 2       | 25 ± 3       | 33 ± 5      | 518 ± 236   |
| AC   | 0.1 ± 0.0   | 0.5 ± 0.4   | 0.1 ± 0.1   | 9 ± 2        | 8.5 ± 0.6  | 0.00 ± 0.00 | 0.2 ± 0.1    | 0.21 ± 0.09 | 4 ± 2       |
| AE   | 0.1 ± 0.0   | 0.9 ± 0.1   | 0.1 ± 0.0   | 11 ± 2       | 11.3 ± 0.5 | 0.00 ± 0.00 | 0.2 ± 0.2    | 0.36 ± 0.09 | 6 ± 3       |
| F    | 0.35 ± 0.04 | 8.0 ± 0.9   | 1.5 ± 0.8   | 0.4 ± 0.2    | 0.8 ± 0.6  | 0.04 ± 0.07 | 3.8 ± 0.5    | 3.4 ± 0.7   | 51 ± 22     |
| D    | 0.11 ± 0.01 | 3.9 ± 0.5   | 0.6 ± 0.3   | 45 ± 9       | 45 ± 2     | 0.03 ± 0.06 | 3.0 ± 0.4    | 2.7 ± 0.5   | 40 ± 17     |
| D1   | 0.26 ± 0.09 | 13.0 ± 1.5  | 1.9 ± 0.8   | 169 ± 32     | 156 ± 10   | 0.3 ± 0.2   | 3.1 ± 0.5    | 3 ± 1       | 74 ± 35     |
| D2   | 1 ± 1       | 33 ± 5      | 7 ± 0.4     | 430 ± 82     | 423 ± 28   | 2 ± 1       | 9 ± 1        | 11 ± 6      | 211 ± 100   |
| D3   | 2.4 ± 0.5   | 31 ± 4      | 3 ± 1       | 444 ± 82     | 426 ± 31   | 1.6 ± 0.9   | 7.9 ± 0.2    | 15 ± 7      | 163 ± 73    |
| P    | 0.52 ± 0.04 | 12 ± 1      | 2.1 ± 0.9   | 136 ± 24     | 136 ± 5    | 0.03 ± 0.06 | 3.6 ± 0.9    | 2 ± 1       | 71 ± 32     |
| P1   | 0.6 ± 0.2   | 30 ± 4      | 5 ± 2       | 376 ± 73     | 359 ± 17   | 2 ± 1       | 0.00 ± 0.00  | 8 ± 4       | 223 ± 107   |
| P2   | 1 ± 2       | 44 ± 7      | 11 ± 5      | 560 ± 107    | 552 ± 36   | 4 ± 2       | 11.21 ± 2.35 | 17 ± 10     | 311 ± 145   |
| P3   | 1 ± 2       | 41 ± 6      | 8 ± 1       | 563 ± 117    | 550 ± 31   | 2 ± 1       | 15 ± 1       | 16 ± 7      | 125 ± 47    |
| ANT  | 0.08 ± 0.01 | 0.29 ± 0.03 | 0.12 ± 0.03 | 3.3 ± 0.7    | 3.0 ± 0.2  | 0.00 ± 0.00 | 7 ± 1        | 0.00 ± 0.00 | 0.00 ± 0.00 |
| FL   | 0.5 ± 0.2   | 1.13 ± 0.09 | 0.9 ± 0.6   | 10 ± 2       | 11 ± 2     | 0.25 ± 0.14 | 0.37 ± 0.09  | 0.6 ± 0.3   | 10 ± 4      |
| PY   | 1 ± 1       | 1.5 ± 0.1   | 3 ± 3       | 14 ± 2       | 17 ± 6     | 0.11 ± 0.02 | 0.32 ± 0.05  | 0.3 ± 0.1   | 7 ± 3       |
| BAA  | 0.03 ± 0.01 | 0.21 ± 0.04 | 0.09 ± 0.01 | 3.0 ± 0.8    | 2.9 ± 0.2  | 0.01 ± 0.01 | 0.04 ± 0.00  | 0.07 ± 0.06 | 0.9 ± 0.4   |
| C    | 0.06 ± 0.04 | 0.7 ± 0.1   | 0.20 ± 0.07 | 8 ± 1        | 7.1 ± 0.5  | 0.11 ± 0.06 | 0.38 ± 0.03  | 0.7 ± 0.4   | 7 ± 3       |
| C1   | 0.01 ± 0.02 | 0.3 ± 0.2   | 0.04 ± 0.06 | 6 ± 1        | 5.6 ± 0.4  | 0.00 ± 0.00 | 1.14 ± 0.08  | 2 ± 1       | 16 ± 6      |
| C2   | 0.02 ± 0.02 | 0.15 ± 0.01 | 0.04 ± 0.01 | 2.6 ± 0.4    | 2.1 ± 0.4  | 0.00 ± 0.00 | 1.3 ± 0.2    | 3 ± 1       | 13 ± 4      |
| C3   | 0.01 ± 0.02 | 0.1 ± 0.1   | 0.01 ± 0.01 | 0.2 ± 0.3    | 0.5 ± 0.2  | 0.00 ± 0.00 | 2.4 ± 0.5    | 3.8 ± 0.8   | 13 ± 3      |
| BBF  | 0.08 ± 0.02 | 0.31 ± 0.03 | 0.18 ± 0.01 | 4.1 ± 0.7    | 4.0 ± 0.5  | 0.03 ± 0.02 | 0.19 ± 0.03  | 0.4 ± 0.1   | 1.7 ± 0.6   |
| BKF  | 0.04 ± 0.02 | 0.09 ± 0.02 | 0.08 ± 0.01 | 0.9 ± 0.5    | 0.8 ± 0.1  | 0.02 ± 0.01 | 0.07 ± 0.01  | 0.14 ± 0.06 | 0.6 ± 0.3   |
| BEP  | 0.08 ± 0.02 | 0.66 ± 0.07 | 0.18 ± 0.01 | 7.4 ± 1.5    | 7.4 ± 0.6  | 0.05 ± 0.02 | 0.24 ± 0.06  | 0.4 ± 0.2   | 2.2 ± 0.9   |
| BAP  | 0.05 ± 0.02 | 0.14 ± 0.01 | 0.09 ± 0.01 | 1.9 ± 0.4    | 2.0 ± 0.2  | 0.00 ± 0.01 | 0.04 ± 0.02  | 0.11 ± 0.09 | 0.5 ± 0.1   |
| PER  | 0.01 ± 0.02 | 0.20 ± 0.04 | 0.03 ± 0.04 | 1.8 ± 0.3    | 2.1 ± 0.2  | 0.02 ± 0.00 | 0.05 ± 0.01  | 0.07 ± 0.03 | 0.5 ± 0.2   |
| IDP  | 0.01 ± 0.02 | 0.02 ± 0.01 | 0.07 ± 0.02 | 0.2 ± 0.1    | 0.3 ± 0.1  | 0.02 ± 0.02 | 0.08 ± 0.03  | 0.14 ± 0.04 | 0.4 ± 0.2   |
| DBA  | 0.04 ± 0.03 | 0.01 ± 0.02 | 0.08 ± 0.07 | 0.4 ± 0.1    | 0.5 ± 0.2  | 0.01 ± 0.01 | 0.05 ± 0.02  | 0.11 ± 0.03 | 0.4 ± 0.2   |
| BGP  | 0.04 ± 0.04 | 0.10 ± 0.05 | 0.00 ± 0.00 | 1.6 ± 0.4    | 1.7 ± 0.5  | 0.04 ± 0.01 | 0.24 ± 0.01  | 0.43 ± 0.06 | 1.2 ± 0.4   |
| ΣPAH | 26 ± 10     | 580 ± 53    | 90 ± 24     | 6834 ± 1033  | 6720 ± 230 | 27 ± 10     | 196 ± 18     | 243 ± 50    | 2962 ± 1258 |



| D    | Control     | Low         | Pulse       | High        |
|------|-------------|-------------|-------------|-------------|
| N    | 0.00 ± 0.00 | 0.9 ± 0.2   | 0.09 ± 0.05 | 4 ± 1       |
| N1   | 0.00 ± 0.01 | 8.0 ± 0.7   | 1.5 ± 0.5   | 41 ± 8      |
| N2   | 1.3 ± 0.2   | 19 ± 2      | 11 ± 4      | 133 ± 20    |
| N3   | 1.9 ± 0.3   | 18 ± 2      | 17 ± 6      | 169 ± 29    |
| N4   | 0.8 ± 0.1   | 7.1 ± 0.7   | 11 ± 4      | 116 ± 24    |
| AC   | 0.00 ± 0.00 | 0.19 ± 0.03 | 0.2 ± 0.1   | 1.5 ± 0.3   |
| AE   | 0.00 ± 0.00 | 0.24 ± 0.08 | 0.2 ± 0.1   | 2.1 ± 0.3   |
| F    | 0.00 ± 0.00 | 1.28 ± 0.08 | 0.6 ± 0.2   | 12 ± 3      |
| D    | 0.00 ± 0.00 | 0.77 ± 0.07 | 0.5 ± 0.2   | 10 ± 3      |
| D1   | 0.08 ± 0.01 | 0.95 ± 0.23 | 0.9 ± 0.3   | 14 ± 4      |
| D2   | 0.33 ± 0.07 | 4 ± 2       | 5 ± 1       | 46 ± 18     |
| D3   | 0.00 ± 0.00 | 6 ± 6       | 8 ± 3       | 46 ± 25     |
| P    | 0.00 ± 0.00 | 0.77 ± 0.09 | 0.19 ± 0.20 | 16 ± 5      |
| P1   | 0.00 ± 0.01 | 2.8 ± 0.5   | 3 ± 1       | 48 ± 13     |
| P2   | 0.00 ± 0.00 | 7 ± 4       | 10 ± 2      | 86 ± 37     |
| P3   | 0.00 ± 0.00 | 4 ± 2       | 7 ± 3       | 39 ± 18     |
| ANT  | 0.00 ± 0.00 | 0.00 ± 0.00 | 0.00 ± 0.00 | 0.00 ± 0.00 |
| FL   | 0.02 ± 0.00 | 0.2 ± 0.2   | 0.22 ± 0.07 | 2 ± 1       |
| PY   | 0.01 ± 0.01 | 0.4 ± 0.5   | 0.15 ± 0.05 | 2 ± 1       |
| BAA  | 0.00 ± 0.00 | 0.02 ± 0.01 | 0.06 ± 0.02 | 0.4 ± 0.2   |
| C    | 0.02 ± 0.01 | 0.2 ± 0.1   | 0.4 ± 0.1   | 2.1 ± 0.7   |
| C1   | 0.00 ± 0.00 | 0.76 ± 0.47 | 1.2 ± 0.6   | 6 ± 3       |
| C2   | 0.00 ± 0.00 | 0.00 ± 0.00 | 0.00 ± 0.00 | 4 ± 3       |
| C3   | 0.00 ± 0.00 | 0.47 ± 0.41 | 1.3 ± 0.5   | 4 ± 2       |
| BBF  | 0.00 ± 0.00 | 0.28 ± 0.40 | 0.2 ± 0.1   | 0.6 ± 0.4   |
| BKF  | 0.00 ± 0.00 | 0.08 ± 0.09 | 0.1 ± 0.0   | 0.2 ± 0.1   |
| BEP  | 0.00 ± 0.00 | 0.40 ± 0.57 | 0.2 ± 0.1   | 0.7 ± 0.4   |
| BAP  | 0.00 ± 0.00 | 0.05 ± 0.06 | 0.04 ± 0.03 | 0.2 ± 0.1   |
| PER  | 0.00 ± 0.00 | 0.01 ± 0.01 | 0.04 ± 0.03 | 0.2 ± 0.1   |
| IDP  | 0.00 ± 0.00 | 0.34 ± 0.59 | 0.03 ± 0.03 | 0.10 ± 0.08 |
| DBA  | 0.00 ± 0.00 | 0.05 ± 0.06 | 0.04 ± 0.02 | 0.13 ± 0.06 |
| BGP  | 0.00 ± 0.00 | 1 ± 2       | 0.10 ± 0.08 | 0.3 ± 0.2   |
| ΣPAH | 5 ± 1       | 86 ± 15     | 81 ± 24     | 808 ± 185   |

| C    | Control     | Low doses   | Pulse (low) | Pulse (High) | High        |
|------|-------------|-------------|-------------|--------------|-------------|
| N    | 1 ± 0       | 24 ± 2      | 2 ± 0       | 264 ± 14     | 255 ± 16    |
| N1   | 4 ± 1       | 88 ± 7      | 13 ± 12     | 926 ± 59     | 972 ± 43    |
| N2   | 6 ± 2       | 162 ± 16    | 52 ± 70     | 1736 ± 144   | 1941 ± 46   |
| N3   | 10 ± 3      | 91 ± 8      | 49 ± 40     | 737 ± 21     | 562 ± 56    |
| N4   | 2.6 ± 0.1   | 0.4 ± 0.3   | 1.0 ± 0.7   | 0.2 ± 0.1    | 0.1 ± 0.1   |
| AC   | 0.1 ± 0.0   | 0.5 ± 0.4   | 0.2 ± 0.3   | 8.1 ± 0.7    | 8.8 ± 0.3   |
| AE   | 0.1 ± 0.0   | 0.9 ± 0.1   | 0.3 ± 0.3   | 9.5 ± 1.0    | 11.2 ± 1.0  |
| F    | 0.38 ± 0.06 | 0.36 ± 0.65 | 0.31 ± 0.20 | 0.42 ± 0.18  | 0.96 ± 0.43 |
| D    | 0.09 ± 0.03 | 4 ± 0       | 2 ± 2       | 38 ± 4       | 48 ± 2      |
| D1   | 0.15 ± 0.02 | 15 ± 3      | 10 ± 9      | 156 ± 20     | 212 ± 21    |
| D2   | 0.21 ± 0.09 | 45 ± 9      | 30 ± 24     | 369 ± 50     | 598 ± 114   |
| D3   | 0.2 ± 0.2   | 48 ± 8      | 30 ± 23     | 393 ± 58     | 686 ± 162   |
| P    | 0.51 ± 0.05 | 12 ± 1      | 6 ± 6       | 113 ± 9      | 143 ± 8     |
| P1   | 0.48 ± 0.06 | 35 ± 7      | 24 ± 21     | 346 ± 42     | 484 ± 71    |
| P2   | 0.3 ± 0.1   | 59 ± 12     | 39 ± 30     | 478 ± 64     | 760 ± 145   |
| P3   | 0.3 ± 0.3   | 63 ± 11     | 38 ± 29     | 517 ± 62     | 890 ± 201   |
| ANT  | 0.08 ± 0.01 | 0.33 ± 0.06 | 0.3 ± 0.1   | 2.6 ± 0.6    | 4.4 ± 0.7   |
| FL   | 0.37 ± 0.04 | 1.4 ± 0.2   | 1.1 ± 0.6   | 9.4 ± 0.7    | 15 ± 3      |
| PY   | 0.31 ± 0.03 | 1.86 ± 0.40 | 1.3 ± 0.8   | 13 ± 1       | 21 ± 4      |
| BAA  | 0.07 ± 0.04 | 0.35 ± 0.02 | 0.2 ± 0.1   | 2.4 ± 0.2    | 4 ± 1       |
| C    | 0.11 ± 0.05 | 0.93 ± 0.13 | 0.7 ± 0.3   | 6.7 ± 0.4    | 10 ± 3      |
| C1   | 0.06 ± 0.05 | 0.55 ± 0.08 | 0.3 ± 0.2   | 4.4 ± 0.5    | 2 ± 3       |
| C2   | 0.05 ± 0.05 | 0.26 ± 0.04 | 0.1 ± 0.1   | 2.9 ± 0.3    | 1 ± 2       |
| C3   | 0.08 ± 0.04 | 0.05 ± 0.06 | 0.06 ± 0.05 | 0.4 ± 0.4    | 0.3 ± 0.6   |
| BBF  | 0.13 ± 0.07 | 0.54 ± 0.09 | 0.3 ± 0.3   | 3.9 ± 0.2    | 6.6 ± 1.5   |
| BKF  | 0.09 ± 0.03 | 0.4 ± 0.2   | 0.3 ± 0.3   | 0.9 ± 0.2    | 1.3 ± 0.5   |
| BEP  | 0.14 ± 0.07 | 0.9 ± 0.1   | 0.5 ± 0.4   | 6.3 ± 0.6    | 2 ± 4       |
| BAP  | 0.11 ± 0.07 | 0.24 ± 0.02 | 0.15 ± 0.08 | 1.8 ± 0.2    | 3.0 ± 0.8   |
| PER  | 0.5 ± 0.4   | 0.5 ± 0.1   | 0.45 ± 0.07 | 1.7 ± 0.3    | 0.8 ± 0.9   |
| IDP  | 0.1 ± 0.1   | 0.12 ± 0.06 | 0.05 ± 0.06 | 0.7 ± 0.6    | 0.8 ± 0.5   |
| DBA  | 0.09 ± 0.02 | 0.18 ± 0.03 | 0.12 ± 0.16 | 1.0 ± 0.4    | 1.4 ± 0.9   |
| BGP  | 0.1 ± 0.1   | 0.24 ± 0.04 | 0.15 ± 0.13 | 2.0 ± 0.1    | 3.2 ± 0.8   |
| ΣPAH | 29 ± 5      | 656 ± 82    | 301 ± 268   | 6151 ± 474   | 7648 ± 622  |

Supplementary Table S2: Two-way ANOVA table. F-values and p-values for time, dose and interaction for *cyp1a*, *kcnh2*, *ncx1*, *cacna1c* and *serca2*.

| Exposure  | Gene           | Interaction |         | Time    |         | Dose    |         |
|-----------|----------------|-------------|---------|---------|---------|---------|---------|
|           |                | F-value     | p-value | F-value | p-value | F-value | p-value |
| Embryonic | <i>cyp1a</i>   | 27.23       | <0.0001 | 82.89   | <0.0001 | 693.1   | <0.0001 |
| Embryonic | <i>kcnh2</i>   | 2.627       | 0.0003  | 46.17   | <0.0001 | 4.880   | 0.0030  |
| Embryonic | <i>ncx1</i>    | 1.159       | 0.2946  | 464.8   | <0.0001 | 3.334   | 0.0219  |
| Embryonic | <i>wnt11</i>   | 1.173       | 0.2813  | 21.81   | <0.0001 | 0.3428  | 0.7944  |
| Embryonic | <i>cacna1c</i> | 1.744       | 0.0274  | 364.1   | <0.0001 | 0.9192  | 0.4340  |
| Embryonic | <i>serca2</i>  | 1.212       | 0.2453  | 8.204   | <0.0001 | 2.180   | 0.0939  |
| Larval    | <i>cyp1a</i>   | 2.934       | 0.0012  | 13.96   | <0.0001 | 543.5   | <0.0001 |
| Larval    | <i>kcnh2</i>   | 1.541       | 0.1355  | 50.21   | <0.0001 | 1.008   | 0.3959  |
| Larval    | <i>ncx1</i>    | 0.8835      | 0.5681  | 8.245   | <0.0001 | 0.3303  | 0.8034  |
| Larval    | <i>wnt11</i>   | 1.262       | 0.2646  | 7.885   | <0.0001 | 15.87   | <0.0001 |
| Larval    | <i>cacna1c</i> | 1.028       | 0.4370  | 12.150  | <0.0001 | 5.905   | 0.0014  |
| Larval    | <i>serca2</i>  | 2.120       | 0.0287  | 17.67   | <0.0001 | 0.5948  | 0.6208  |

Supplementary Table S3: Real time qPCR primer and probe sequences and amplication efficiency, linearity and amplicon length for *cyp1a*, *wnt11*, *kenh2*, *ncx1*, *cacna1c*, *serca2* and *ef1a*. E, efficiency (%); R<sup>2</sup>, linearity standard curve; A, amplicon length (bp); Q, quencher.

| Gene           | Forward primer 5'-3' | Reverse primer 5'-3'   | Probe 5'-3'                                  | E   | R <sup>2</sup> | A   | Q     |
|----------------|----------------------|------------------------|----------------------------------------------|-----|----------------|-----|-------|
| <i>cyp1a</i>   | CCTCCTTCCTGCCCTTCAC  | TTGGGAATGAAGTAGCCATTGA | 6FAM-CCTCACTGCCGCCACAAAAAGACACATC            | 110 | 0.997          | 83  | Tamra |
| <i>wnt11</i>   | AACCCTACACCGAGAAC    | CTGGACTATCCTTTCCGAC    | FAM-TGGTGGTGTACTCGTCACTGCAAGAA               | 106 | 0.997          | 93  | Tamra |
| <i>kenh2</i>   | ACGTGAACCAACAGCAGGAG | AGCCAGAGCGGAAGATAAGCAG | FAM-<br>TTACATGACCCGGGTGGTTCGCCATCGACCTTT    | 109 | 0.982          | 126 | Tamra |
| <i>ncx1</i>    | CCGCCCTCATCTACATGTTT | ACGTGATGACCCTCGATGGAG  | FAM-ATGTCCATCATCCGCCGACCGCTTCAT              | 114 | 0.997          | 75  | Tamra |
| <i>cacna1c</i> | ATGAGAACAGCTCCCTCAC  | ATGATGACGGGACAAAC      | FAM-<br>GCAGCAATTTTGGCCATATTTACTTTGTCAAGCTTC | 95  | 0.984          | 118 | Tamra |
| <i>serca2</i>  | TGTTCCCAAGTATGAAGCCC | CACCTTCTCAAACACACCC    | FAM-TGCAACGACTCATCGCTGGACTTCAAC              | 101 | 0.998          | 102 | Tamra |
| <i>ef1a</i>    | ATCGGGGTATCGGAACAG   | GCTTGAGGACACCGGTCTCA   | 6FAM-ACCCGTGGCCGTG                           | 111 | 0.998          | 55  | None  |

Supplementary Video S1: Silent ventricle following embryonic oil exposure. Movie shows a control 2 dph larva with normal heart function, followed by a 2 dph larva with non-contracting ventricle. Representative larva is from the high dose for 24-hr transient embryonic exposure.

Supplementary Video S2: Atrioventricular conduction block during larval exposure. Movie shows a control 9 dph larva with normal heart function, followed by a 9 dph larva exposed for the high dose with skipping of ventricular contractions.

Supplementary Video S3: Reduced contractility and poor looping in zebrafish exposed to 50 ppm dispersed crude Heidrun oil. Movie shows a control zebrafish embryo (48 hpf) with normal heart shape and function, followed by an exposed embryo with a poorly looped heart showing normal heart rhythm but reduced contractility.
